# Supplementary material for: Noncanonical IL6 Signaling-Mediated Activation of YAP Regulates Cell Migration and Invasion in Ovarian Clear Cell Cancer
Source: Oxford University Press journal article supplement (doi:10.1158/0008-5472.can-19-3044), 2020-09-11
Supplement: 00085472can193044-sup-229879_3_supp_6456683_qc636y.xlsx [file 00085472can193044-sup-229879_3_supp_6456683_qc636y.xlsx]

## Sheet: Drug list
Drug Name	Main Target
AT9283	AUR
KU0063794	mTOR
GNE-493	Pan-PI3K
Merck-22-6	AKT
ZSTK474	PI3K
AZD7762	CHK
RO495	TYK
TG-46	JAK2
TG101348	JAK2
GSK461364	PLK
AZD8055	mTOR
AT9283	Bcr-Abl, JAK, Aurora Kinase
BEZ235(NVP-BEZ235)	mTOR, PI3K
KU-0063794	mTOR
NA	NA
UNC0642	inhibitor of G9a/GLP
17-AAG(Geldanamycin	HSP90
Ganetespib (STA-9090	HSP90 and its client proteins inhibitor
SP600125	JNK
Quercetin(Sophoretin)	PI3K,PKC, Src
PD0325901	MEK
Dasatinib (BMS-354825 Sprycel)	Multi Kinase Inhibitors (Bcr-Abl SRC)
GDC-0941	PI3K
BIX 02189	MEK
Akt-I-1 (Akti-1)	Akt/PKB
Akt-I-1 2 (Akti-1/2)	Akt/PKB
VX-680 (Tozasertib MK-0457)	AUR
JNJ7706621	AUR (CDK)
SNS-314	AUR
CYC-116	AUR
Imatinib mesylate (Gleevec Glivec CGP-57148B STI-571)	BCR-ABL
AT-7519	CDK
SNS-032 (BMS387032)	CDK
AV-412	EGFR/HER2
CI-1033 (Canertinib PD-183805)	EGFR
Erlotinib Hydrochloride (Tarceva CP-358774 OSI-774 NSC 718781)	EGFR
Gefitinib (ZD1839 Iressa)	EGFR
Lapatinib (GW572016 Tykerb)	EGFR; HER2
Vandetanib (ZD6474 Zactima)	EGFR; VEGFR
PF-562271	FAK; PYK2 RTKs
AC220	FLT3 FMS cKIT PDGFR
Ki20227 (+-)	FMS
CYT387	JAK2
CC-401	JNK
Masatinib (AB1010 Masivet)	c-Kit
AMG-47a	LCK
BMS-5	LIMK
SB202190	MAPK (p38MAP)
SB203580 (RWJ 64809 PB 203580)	MAPK (p38MAP)
SB242235	MAPK (p38MAP)
SD-06	MAPK (p38MAP)
SD169	MAPK (p38MAP)
TAK-715	MAPK (p38MAP)
VX-702	MAPK (p38MAP)
RWJ-67657	MAPK (p38MAP)
AZD6244 (ARRY-142886 Selumetinib)	MEK
CI-1040 (PD184352)	MEK
PF04217903	MET
JNJ38877605	MET
BX912	PDK1
BX795	PDK1 TBK1
BEZ-235 (NVP-BEZ235)	PI3K mTOR
PIK-93	PI3K
PI103	PI3K
YM201636	PIK five
PF431396	PYK2
PLX4720	B-RAF
SR3677	ROCK-II
BI-D1870	RSK
AMG-Tie2-1	TIE-2
Pazopanib (GW786034 Votrient)	VEGFR c-Kit PDGFR
AV951 (KRN951 Tivozanib)	VEGFR
ABT-869 (Linifanib AL-39324 RG3635)	Multi Kinase Inhibitor (Flt3 PDGFR & VEGFR)
Bosutinib (SKI-606)	Multi Kinase Inhibitor (BCR-Abl Src)
Motesanib (AMG-706)	Multi Kinase Inhibitors (c-Kit PDGFR & VEGFR)
MP-470 (Amuvatinib)	Multi Kinase Inhibitor (Flt3 Met Kit c-Ret & PDGFR)
Tandutinib (CT53518 MLN518)	Multi Kinase Inhibitor (cKit FLT3 PDGFR)
E7080	Multi Kinase Inhibitor (VEGFR FGFR and SCFR)
AS-252424	PI3K
LY294002	PI3K
SB 525334	ALK
SB-216763	GSK-3
AS-605240	PI3K
PD98059	MEK
Fasudil HCl	ROCK
Purvalanol B	CDK
SB 431542	ALK
ZM-447439	Aurora Kinase
Ki8751	VEGFR, c-Kit, PDGFR, FGFR
SU-6668 (TSU-68)	Multi Kinase Inhibitor (VEGF PDGFR and FGFR)
KU55933	ATM
Mubritinib (TAK-165)	HER2
AG-490	JAK, EGFR
U0126-EtOH	MEK
Vatalanib	VEGFR, c-Kit, Flk, Flt, FGFR
AZD0530(Saracatinib)	SRC, Abl
ABT-737	Bcl-2
AG13958	VEGFR
Axitinib (AG013736)	Multi Kinase Inhibitor (cKIT PDGFR & VEGFR)
AZ-960	JAKs
AZD7762	CHK
BI-2536(R-)	PLK
Bisindoylmaleimide X (Ro 31-8425)	PKC
BMS-2	MET
BMS-3	LIMK
CP690550 (Tofacitinib)	JAKs
CP-724714	ErbB2/HER2
Flavopiridol (HMR-1275 Alvocidib L868275)	CDK
GSK690693	Akt/PKB
GW441756	TrkA
IC87114	PI3K
Merck -5	JAKs
Nilotinib (AMN107 Tasigna)	Multi Kinase Inhibitor (Bcr-Abl Kit & PDGFR)
PD173955	BCR-ABL c-Src
PD173955-Analogue 1	c-Src
PIK-75	PI3K
PIK-90	PI3K
RHO-15 (GSK429286A)	ROCK
SB590885	B-RAF
Sorafenib (Nexavar BAY43-9006)	Multi Kinase Inhibitor (B-Raf & VEGFR)
SU-5402	FGFR VEGFR
Sunitinib (Sutent SU11248)	Multi Kinase Inhibitor (Flt3 Kit PDGFR & VEGFR)
TGX221	PI3K
Vargatef (BIBF 1120 Intedanib)	Multi Kinase Inhibitor (VEGF PDGFR and FGFR)
Danusertib (PHA-739358)	AUR BCR-ABL FGFR
PHA690509	CDK
KU57788 (NU7441)	DNA-PK
PIK-294	PI3K
TOVOK (BIBW-2992 Afatinib)	EGFR/HER2
R1487	MAPK (p38MAP)
CX-4945	CK2
A-674563	AKT CDK PKA
SMI-4a	PIM
GNE-490	pan-PI3K
AP24534	multi kinase inhibitor (BCR-ABL VEGFR FGFR Tie2 Flt3)
S-99	ASK
INCB018424 (Ruxolitinib)	JAK1 JAK2
R406	Syk
R788 (Fostamatinib FosD tamatinib fosdium)	Syk
VX745	MAPK (p38MAP)
GSK-25	ROCK
AMG-25	c-Kit
GSK2126458 (HYR-582)	PI3K
XL147 (SAR245408)	PI3K
XL880 (GSK1363089 Foretinib EXEL-2880)	cMET
Bayer-18	TYK
R428	AXL
CHIR-258 (TKI258 Dovitinib)	Multi Kinase Inhibitors (CKit FGFR FLT3 FMS PDGFR VEGFR)
Dianilinopyrimidine_01	Pan Kinase Kinhibitor
TG101209	JAK2
TG-89	JAK2
TG100115	PI3K
S6K-18	S6K
JNJ-38158471	VEGFR-2
INCB424-Analogue	JAK1/JAK2
WZ4002	EGFR
WZ8040	EGFR
BMS-599626	EGFR, HER2
Neratinib	HER2, EGFR
PD153035 hydrochloride	EGFR
Pelitinib	EGFR
WZ3146	EGFR
BMS 794833	c-Met, VEGFR, Met, Axl, Flt
Cediranib(AZD2171)	VEGFR, FGFR
KRN 633	VEGFR, PDGFR, c-Kit
MGCD-265	c-Met, VEGFR, Tie-2
OSI-930	c-Kit, VEGFR
SGX-523	c-Met, VEGFR
KW 2449	Flt, Abl, Aurora Kinase
BAY 73-4506(Regorafenib)	c-Kit, B-Raf, VEGFR
PF-2341066	c-Met, ALK
SU11274(PKI-SU11274)	c-Met
ON-01910	PLK
NVP-TAE684	ALK
HMN-214	PLK
CCT129202	Aurora kinase
BS-181 hydrochloride	CDK
PD0332991	CDK
PHA-793887	CDK
Roscovitine(CYC202)	CDK
Aurora A Inhibitor I	Aurora Kinase
AZD1152-HQPA(Barasertib)	Aurora Kinase
Hesperadin	Aurora kinase
AZD8330	MEK
BIX 02188	MEK
MLN8237	Aurora
PHA-680632	Aurora Kinase
AS703026	MEK
LY2784544	JAK
AT7867	Akt, S6 kinase
MK-2206	Akt
KU-60019	ATM
Enzastaurin	PKC
CHIR-99021	GSK-3
WYE-354	mTOR
Temsirolimus	mTOR
Rapamycin(Sirolimus)	mTOR
Everolimus(RAD001)	mTOR
Indirubin	CDK, GSK-3
Deforolimus(MK-8669)	mTOR
XL765	PI3K, mTOR
AZD6482	PI3K
RAF265	RAF, VEGFR
GDC-0879	B-Raf
Vinorelbine(Navelbine)	p38 MAPK
BIRB 796	p38 MAPK
LY2228820	p38 MAPK
PD318088	MEK
BMS 777607	c-Met
AEE788	EGFR, HER1/2, VEGFR, FGFR
GSK1059615	PI3K, mTOR
SGI-1776	Pim
XL184	VEGFR, c-Met, Flt, Tie-2, c-Kit
PIK-293	PI3K
ENMD-2076	Flt, Aurora Kinase, Src, VEGFR
Ibrutinib (PCI-32765)	BTK
PD0325901	MEK
ABT-737	Bcl-2
Dasatinib	SRC, Abl
GDC-0941	PI3K
VX-680	Aurora Kinase
JNJ-7706621	CDK, Aurora Kinase
SNS-314 Mesylate	Aurora Kinase
CYC116	Aurora Kinase, VEGFR
Imatinib Mesylate	c-Kit, PDGFR
Imatinib(STI571)	PDGFR, c-Kit
AT7519	CDK
SNS-032(BMS-387032)	CDK
CI-1033(Canertinib)	EGFR, HER2
Erlotinib Hydrochloride	EGFR
Gefitinib(Iressa)	EGFR, Akt
Lapatinib Ditosylate	EGFR, HER2
Vandetanib	VEGFR, EGFR, Src
AC-220	FLT
Masitinib(AB1010)	c-Kit, PDGFR, FGFR, VEGFR
SB 202190	p38 MAPK
SB 203580	p38 MAPK
VX-702	p38 MAPK, IL-6, IL-1ß, TNFa
AZD6244(Selumetinib)	MEK
CI-1040 (PD184352)	MEK
PF-04217903	c-Met
JNJ-38877605	c-Met
PIK-93	PI3K
PI-103	PI3K, mTOR
PLX-4720	B-Raf
Pazopanib Hydrochloride	VEGFR
AV-951(Tivozanib)	VEGFR, c-Kit, PDGFR
ABT-869	RTK, VEGFR, PDGFR, FGFR
Motesanib Diphosphate	VEGFR, PDGFR, c-Kit, Src
MP-470	c-Met, c-Kit, PDGFR, Flt3, Src
Nilotinib	Bcr-Abl
Sorafenib Tosylate	VEGFR, PDGFR, RAF, MEK
Tandutinib (MLN518)	FLT-3, PDGFR, KIT
Sunitinib Malate	FLT3, PDGF, VEGFR, Kit
LY294002	PI3K
SB 216763	GSK-3
TSU-68	VEGFR, PDGFR, FGFR
KU-55933	ATM
Axitinib	VEGFR
BI 2536	PLK
CP-724714	HER2
IC-87114	PI3K
PIK-90	PI3K
GSK429286A	ROCK
TGX-221	PI3K
BIBF1120(Vargatef)	VEGFR, PDGFR, FGFR
PHA-739358(Danusertib)	Aurora Kinase, Bcr-Abl
BIBW2992(Tovok)	EGFR, HER2
AP24534	VEGFR, FGFR, PDGFR, Flt
R406	Syk
R406(free base)	Syk
VX-745	p38 MAPK
XL147	PI3K
XL880(GSK1363089)	c-Met, VEGFR, FGFR
TG100-115	PI3K
ZSTK474	PI3K
Bosutinib(SKI-606)	Src
Flavopiridol(Alvocidib)	CDK
AZD1480	JAK
PIK-75 Hydrochloride	PI3K, DNA-PK
	Bcl-xL
	Bcl-xL
ABT-737	Bcl-2 inhibitor
ABT-199	Bcl-2 inhibitor
ABT-263	Bcl-2 inhibitor
AT13387	HSP90 inhibitor
ML-4924	NAE inhibitor
	Hsp70
	Hsp70
	Hsp70
	Hsp70
	Hsp70
BML-284	Wnt agonist
Vicriviroc Malate	CCR5(cellular coreceptor 5)
Perindopril Erbumine	RAAS
YM155	Survivin
Asenapine maleate	"5-HT, adrenergic receptor"
Atropine sulfate monohydrate	mAChRs
SB 743921	Kinesin spindle protein
MK 3207 hydrochloride	CGRP
17-DMAG	HSP90
Obatoclax Mesylate	Bcl-2
Sitagliptin phosphate	DPP-4
AG-014699	PARP
NVP-ADW742	IGF-1R
BIBR1532	Telomerase
NPI-2358	VDA
Camptothecine	Topoisomerase
ABT-751	Microtubule Formation
Zibotentan(ZD4054)	ETA-receptor
Epothilone A	Microtubule Formation
Epothilone B(EPO906)	Epothilone B
Pomalidomide	TNF-alpha
LY500307	Estrogen receptor Beta
BSI-201	PARP
Cryptotanshinone	Stat
BIIB021	HSP90
AG14361	PARP
JNJ 26854165	p53
MLN2238	Proteasome
Semagacestat	gamma-Secretase
S31-201	STAT3
BMS-707035	HIV-1 Integrase(IN)
Cyclopamine	Hedgehog
GDC-0449(Vismodegib)	Hedgehog
VX-222	HCV protease
Elvitegravir	HIV Integrase
RO4929097	gamma-Secretase
NVP-BEP800	HSP90
Tipifarnib	farnesyltransferase(Ftase)
Ispinesib mesilate	Kinesin spindle protein
MLN9708	Proteasome
BMS-708163	gamma-secretase
17-AAG(Geldanamycin)	HSP90
Danoprevir(ITMN-191)	Proteasome
BMS-790052	HCV protease
ABT-888	PARP
AZD2281(Olaparib)	PARP
NVP-AUY922	HSP90
TW-37	Bcl-2
ABT-263(Navitoclax)	Bcl-2
Febuxostat	XAO
VX-770	CFTR
Rivaroxaban(Xarelto)	Factor Xa
Baicalin	"prolyl endopeptidase, GABA receptor"
Apixaban	Factor Xa
BIBR 953	thrombin
LDE225	Smo
BIBR-1048	thrombin
Icariin	PDE
Cilomilast(SB-207499)	PDE
Necrostatin-1	Novel inhibitor of non-apoptotic cell death (necroptosis)
Ganetespib (STA-9090)	HSP90 and its client proteins inhibitor
Sodium valproate	HDAC
Trichostatin A	HDAC inhibitor
2,4-Pyridinedicarboxylic Acid	Histone demethylase inhibitor
Garcinol	HAT inhibitor
Splitomicin	SIRT-2 inhibitor
BML-210	HDAC inhibitor
Apicidin	HDAC inhibitor
Suberoyl bis-hydroxamic acid	HDAC inhibitor
Scriptaid	HDAC inhibitor
Nullscript	Scriptaid Neg control
5-Aza-2 -deoxycytidine	DNA Me transferase inhibitor
Zebularine	DNA Me transferase inhibitor
SAHA	HDAC inhibitor
Isonicotinamide	nicotinamide antagonist
ITSA-1	Inhibitor of TSA activity
Phenylbutyrate·Na	HDAC inhibitor
Tranylcypromine hemisulfate	Lysine demethylase inhibitor
Valproic acid	HDAC inhibitor
EX-527	SIRT1 inhibitor
Resveratrol	SIRT1 activator
M-344	HDAC inhibitor
Nicotinamide	SIRT inhibitor
BML-266	SIRT2 inhibitor
Piceatannol	SIRT activator
Fluoro-SAHA	HDAC inhibitor
Valproic acid hydroxamate	HDAC inhibitor
AGK2	SIRT2 inhibitor
Salermide	SIRT inhibitor
MC-1293	HDAC inhibitor
Anacardic acid	HAT inhibitor
B2	SIRT2 inhibitor
BIX-01294	Histone methyl transferase inhibitor
Butyrolactone 3	HAT inhibitor
CTPB	HAT inhibitor
Oxamflatin	HDAC inhibitor
Sirtinol	SIRT inhibitor
Suramin·6Na	SIRT1 inhibitor
BML-278	SIRT1 actvator
NCH-51	HDAC inhibitor
CI-994	HDAC inhibitor
NSC-3852	HDAC inhibitor
Aminoresveratrol sulfate	SIRT1 activator
BML-281	HDAC-6 inhibitor
Triacetylresveratrol	SIRT1 activator
JNJ-26481585	HDAC
ITF2357	HDAC
LBH589 (Panobinostat)	HDAC
MS-275	HDAC
Belinostat	HDAC
PCI-24781	HDAC
LAQ824(NVP-LAQ824,Dacinostat)	HDAC
MGCD0103(Mocetinostat)	HDAC
SRT1720	SIRT
CUDC-101	HDAC, EGFR, HER2
Droxinostat	HDAC
MC1568	HDAC
SB939	HDAC
AR-42	HDAC
GSK J4	Histone demethylase JMJD3/UTX and H3K27 inhibitor
GSK343	inhibitor of EZH2
IOX-1	A Cell-Penetrating Broad-Spectrum 2-Oxoglutarate Oxygenase Inhibitor
IOX2	Inhibitor of the Hypoxia Inducible Factor (HIF) Prolyl-Hydroxylases
PFI-1	BET Bromodomains inhibitor
SGC0946	inhibitor of DOT1L
UNC0642	inhibitor of G9a/GLP
UNC1215A	G9a Inhibitor
UNC638A	G9a Inhibitor
UNC669B	G9a Inhibitor
YK-4-279	block RHA binding to ESFLI1 (oncogenic fusion protein)
C646	Selective p300/CREB-binding protein (CBP) inhibitor.
(+)JQ1/SGCBD01	BET Bromodomains inhibitor
ITF2357	HDAC
Decitabine	Antimetabolites
EX 527	Sirtuin
MC1568	HDAC
Belinostat(PXD101)	HDAC
SB939	HDAC
LAQ824	HDAC
JNJ-26481585	HDAC
MGCD0103(Mocetinostat)	HDAC
CUDC-101	HDAC, EGFR, HER2
LBH-589(Panobinostat)	HDAC
MS-275	HDAC
Trichostatin A	HDAC
Droxinostat	HDAC
Vorinostat	HDAC
Trichostatin A	HDAC
Vorinostat	HDAC
EX 527	SIRT
