# Supplementary material for: Noncanonical IL6 Signaling-Mediated Activation of YAP Regulates Cell Migration and Invasion in Ovarian Clear Cell Cancer
Source: Oxford University Press journal article supplement (doi:10.1158/0008-5472.can-19-3044), 2020-09-11
Supplement: 00085472can193044-sup-229879_3_supp_6456686_q7636y.xlsx [file 00085472can193044-sup-229879_3_supp_6456686_q7636y.xlsx]

## Sheet: Sheet1
Drug Name	Main target	Library
Trichostatin A	HDAC inhibitor	Epigenetics
Garcinol	HAT inhibitor	Epigenetics
Apicidin	HDAC inhibitor	Epigenetics
Scriptaid	HDAC inhibitor	Epigenetics
M-344	HDAC inhibitor	Epigenetics
Oxamflatin	HDAC inhibitor	Epigenetics
BML-281	HDAC-6 inhibitor	Epigenetics
JNJ-26481585	HDAC	Epigenetics
ITF2357	HDAC	Epigenetics
MS-275	HDAC	Epigenetics
Belinostat	HDAC	Epigenetics
PCI-24781	HDAC	Epigenetics
LAQ824(NVP-LAQ824,Dacinostat)	HDAC	Epigenetics
Droxinostat	HDAC	Epigenetics
SB939	HDAC	Epigenetics
AR-42	HDAC	Epigenetics
PFI-1	BET Bromodomains inhibitor	Epigenetics
(+)JQ1/SGCBD01	BET Bromodomains inhibitor	Epigenetics
AV-412	EGFR/HER2	Kinase
Akt-I-1 (Akti-1)	Akt/PKB	Kinase
Danusertib (PHA-739358)	AUR BCR-ABL FGFR	Kinase
Axitinib (AG013736)	Multi Kinase Inhibitor (cKIT PDGFR & VEGFR)	Kinase
BMS-2	MET	Kinase
PF-562271	FAK; PYK2 RTKs	Kinase
PI103	PI3K	Kinase
KU0063794	mTOR	Kinase
TOVOK (BIBW-2992 Afatinib)	EGFR/HER2	Kinase
GSK-25	ROCK	Kinase
SMI-4a	PIM	Kinase
Pelitinib	EGFR	Kinase
CCT129202	Aurora kinase	Kinase
CHIR-99021	GSK-3	Kinase
SNS-032(BMS-387032)	CDK	Kinase_dups
AT9283	Bcr-Abl, JAK, Aurora Kinase	Kinase_dups
ZSTK474	PI3K	Kinase_dups
BIBW2992(Tovok)	EGFR, HER2	Kinase_dups
ABT-199	Bcl-2 inhibitor	TargetedAgents
	Bcl-xL	TargetedAgents
#N/A	#N/A	#N/A
