# Supplementary material for: Noncanonical IL6 Signaling-Mediated Activation of YAP Regulates Cell Migration and Invasion in Ovarian Clear Cell Cancer
Source: Oxford University Press journal article supplement (doi:10.1158/0008-5472.can-19-3044), 2020-09-11
Supplement: 00085472can193044-sup-229879_3_supp_6456687_qq636y.xlsx [file 00085472can193044-sup-229879_3_supp_6456687_qq636y.xlsx]

## Sheet: Sheet1
Drug names	Main targets	Library
Scriptaid	HDAC inhibitor	Epigenetics
ITF2357	HDAC	Epigenetics_dup
LAQ824	HDAC	Epigenetics_dup
Vorinostat	HDAC	Epigenetics_dup
AT-7519	CDK	Kinase
Masatinib (AB1010 Masivet)	c-Kit	Kinase
AG13958	VEGFR	Kinase
CI-1033 (Canertinib PD-183805)	EGFR	Kinase
Erlotinib Hydrochloride (Tarceva CP-358774 OSI-774 NSC 718781)	EGFR	Kinase
PF431396	PYK2	Kinase
JNJ7706621	AUR (CDK)	Kinase
BMS-3	LIMK	Kinase
Vandetanib (ZD6474 Zactima)	EGFR; VEGFR	Kinase
Gefitinib (ZD1839 Iressa)	EGFR	Kinase
TOVOK (BIBW-2992 Afatinib)	EGFR/HER2	Kinase
JNJ-38158471	VEGFR-2	Kinase
PD153035 hydrochloride	EGFR	Kinase
BMS-599626	EGFR, HER2	Kinase
PHA-793887	CDK	Kinase
Pelitinib	EGFR	Kinase
WZ8040	EGFR	Kinase
PHA-680632	Aurora Kinase	Kinase
Hesperadin	Aurora kinase	Kinase
Neratinib	HER2, EGFR	Kinase
AZD0530(Saracatinib)	SRC, Abl	Kinase
Vinorelbine(Navelbine)	p38 MAPK	Kinase
AEE788	EGFR, HER1/2, VEGFR, FGFR	Kinase
Ibrutinib (PCI-32765)	BTK	Kinase
Bosutinib(SKI-606)	Src	Kinase_dups
Gefitinib(Iressa)	EGFR, Akt	Kinase_dups
BIBW2992(Tovok)	EGFR, HER2	Kinase_dups
17-DMAG	HSP90	TargetedAgents
NPI-2358	VDA	TargetedAgents
Camptothecine	Topoisomerase	TargetedAgents
Epothilone A	Microtubule Formation	TargetedAgents
MLN9708	Proteasome	TargetedAgents
17-AAG(Geldanamycin)	HSP90	TargetedAgents
ABT-263	Bcl-2 inhibitor	TargetedAgents
AT13387	HSP90 inhibitor	TargetedAgents
