# Supplementary material for: Noncanonical IL6 Signaling-Mediated Activation of YAP Regulates Cell Migration and Invasion in Ovarian Clear Cell Cancer
Source: Oxford University Press journal article supplement (doi:10.1158/0008-5472.can-19-3044), 2020-09-11
Supplement: 00085472can193044-sup-229879_3_supp_6456695_qy636y.xlsx [file 00085472can193044-sup-229879_3_supp_6456695_qy636y.xlsx]

## Sheet: Sheet1
COMPOUND_ID	Drug Name	Supplier	Supplier ID	Therapeutic Group
WEHI-1224612	MK-2206	Selleck	S1078	Akt	8
WEHI-1224620	Everolimus(RAD001)	Selleck	S1120	Akt, mTOR
WEHI-1224622	Deforolimus(MK-8669)	Selleck	S1022	Akt, mTOR
WEHI-1224618	Temsirolimus	Selleck	S1044	Akt, mTOR
WEHI-1211324	GDC-0941	Selleck	S1065	Akt, PI3K
WEHI-1218016	ZSTK474	SYNthesis	SYN-1099	Akt, PI3K
WEHI-1212946	BEZ-235 (NVP-BEZ235)	SYNthesis	SYN-1018	Akt, PI3K
WEHI-1212887	Akt-I-1 2 (Akti-1/2)	SYNthesis	SYN-1006	Akt/PKB
WEHI-1224593	MLN8237	Selleck	S1133	Aurora	8
WEHI-1224589	AZD1152-HQPA(Barasertib)	Selleck	S1147	Aurora Kinase
WEHI-1224583	CCT129202	Selleck	S1519	Aurora kinase
WEHI-1224594	PHA-680632	Selleck	S1454	Aurora Kinase
WEHI-1216224	ZM-447439	Selleck	S1103	Aurora Kinase
WEHI-1212893	AT9283	Selleck	S1134	Aurora Kinase, Bcr-Abl, JAK
WEHI-1224723	ENMD-2076	Selleck	S1181	Aurora Kinase, Src, VEGFR, Flt
WEHI-1212891	JNJ-7706621	Selleck	S1249	Aurora Kinase,CDK
WEHI-1191381	ABT-737	Selleck	S1002	Bcl-2	5
WEHI-1208610	Obatoclax Mesylate	Selleck	S1057	Bcl-2
WEHI-1191381	ABT-737	Selleck	S1002	Bcl-2
WEHI-1210164	ABT-199	Active Biochemicals	A-1231	Bcl-2 inhibitor
WEHI-1225819	ABT-263	Eurasias	ABT-263	Bcl-2 inhibitor
WEHI-1245943	PFI-1	SGC	PFI-1	BET Bromodomains inhibitor	2
WEHI-1217978	Sorafenib (Nexavar BAY43-9006)	SYNthesis	SYN-1082	Multi Kinase Inhibitor (B-Raf & VEGFR)	5
WEHI-1217980	Sunitinib (Sutent SU11248)	SYNthesis	SYN-1086	Multi Kinase Inhibitor (Flt3 Kit PDGFR & VEGFR)
WEHI-1212965	Pazopanib (GW786034 Votrient)	SYNthesis	SYN-1058	VEGFR c-Kit PDGFR
WEHI-1212974	Sorafenib Tosylate	Selleck	S1040	VEGFR, PDGFR, RAF, MEK
WEHI-1212913	PF-562271	SYNthesis	SYN-1064	FAK; PYK2 RTKs
WEHI-1225708	(+)JQ1/SGCBD01	SGC	(+)JQ1/SGCBD01	BET Bromodomains inhibitor
WEHI-1212908	Gefitinib (ZD1839 Iressa)	SYNthesis	SYN-1042	EGFR	11
WEHI-1212907	Erlotinib Hydrochloride (Tarceva CP-358774 OSI-774 NSC 718781)	SYNthesis	SYN-1039	EGFR
WEHI-1212907	Erlotinib Hydrochloride	Selleck	S1023	EGFR
WEHI-1224564	Pelitinib	Selleck	S1392	EGFR
WEHI-1212908	Gefitinib(Iressa)	Selleck	S1025	EGFR, Akt
WEHI-1224711	AEE788	Selleck	S1486	EGFR, HER1/2, VEGFR, FGFR
WEHI-1212906	CI-1033(Canertinib)	Selleck	S1019	EGFR, HER2
WEHI-1224562	Neratinib	Selleck	S2150	EGFR, HER2
WEHI-1224678	CUDC-101	Selleck	S1194	EGFR, HER2, HDAC
WEHI-1212911	Vandetanib (ZD6474 Zactima)	SYNthesis	SYN-1090	EGFR; VEGFR
WEHI-1217987	TOVOK (BIBW-2992 Afatinib)	SYNthesis	SYN-1100	EGFR/HER2
WEHI-1224641	17-DMAG	Selleck	S1142	HSP90	3
WEHI-1224642	17-AAG(Geldanamycin)	Selleck	S1141	HSP90
WEHI-1225925	AT13387		TLN-249-098-04	HSP90 inhibitor
WEHI-1225755	AR-42	Selleck	S2244	HDAC	14
WEHI-1224681	LBH589 (Panobinostat)	Selleck	S1030	HDAC
WEHI-1224673	MS-275	Selleck	S1053	HDAC
WEHI-1224679	Belinostat	Selleck	S1085	HDAC
WEHI-1225756	PCI-24781	Selleck	S1090	HDAC
WEHI-1224675	MGCD0103(Mocetinostat)	Selleck	S1122	HDAC
WEHI-1224718	ITF2357	Selleck	S2170	HDAC
WEHI-1216970	Vorinostat	Selleck	S1047	HDAC
WEHI-1224670	Trichostatin A	Selleck	S1045	HDAC
WEHI-1224677	JNJ-26481585	Selleck	S1096	HDAC
WEHI-1224675	MGCD0103(Mocetinostat)	Selleck	S1122	HDAC
WEHI-1224681	LBH-589(Panobinostat)	Selleck	S1030	HDAC
WEHI-1216491	Valproic acid	Enzo	GR-352	HDAC inhibitor
WEHI-1225736	Apicidin	Enzo	GR-340	HDAC inhibitor
					42
